# Supplementary material
Source: PubMed Central journal article supplement (PMC4974396)
Supplement: supp_M116.715466_Supplemental_Tables.pdf [file supp_M116.715466_Supplemental_Tables.pdf]

## How Glycosaminoglycans Promote Fibrillation of Salmon Calcitonin

Kirsten Gade Malmos<sup>1,2</sup>, Morten Bjerring<sup>1,4</sup>, Christian Moestrup Jessen<sup>1</sup>, Erik Holm Toustrup Nielsen<sup>1</sup>, Ebbe T. Poulsen<sup>2</sup>, Gunna Christiansen<sup>3</sup>, Thomas Vosegaard<sup>1,4</sup>, Troels Skrydstrup<sup>1</sup>, Jan J. Enghild<sup>2</sup>, Jan Skov Pedersen<sup>1,4</sup>, Daniel E. Otzen<sup>1,2</sup>

Supplemental tables are related to the PRM-MS analysis and include: Table S1 Inclusion list for MS PRM-MS, Table S2 Search Parameters for PRM-MS and Table S3 Coverage Overview for PRM-MS Search

Table S1 Inclusion list

| PRM-MS inclusion list for calcitonin |                       |
|--------------------------------------|-----------------------|
| Precursor ion                        | Sequence              |
| 619.7970                             | C[CAM]SNLSTC[CAM]VLGK |
| 427.7402                             | LSQELHK.+2y2          |
| 746.3812                             | LQTYPRNTGSGTP[Ami]    |
| 389.2163                             | LQTYPR.+2y1           |
| 367.1774                             | TNTGSGTP[Ami]         |

Table S2 Search Parameters for PRM-MS

| Search Parameters                                                                                                          | MDM v. 1.3.0                    |
|----------------------------------------------------------------------------------------------------------------------------|---------------------------------|
| <u>Subsamples: 2015-09-23 ETP Kirsten PRM A1.mgf, 2015-09-23 ETP Kirsten PRM B1.mgf, 2015-09-23 ETP Kirsten PRM E1.mgf</u> |                                 |
| Database:                                                                                                                  | Proteins                        |
| Fasta Version:                                                                                                             | Proteins_2015-09-22.fasta       |
| # Sequences:                                                                                                               | 267                             |
| Taxonomy:                                                                                                                  | All entries                     |
| Enzyme:                                                                                                                    | Trypsin                         |
| Fixed modifications:                                                                                                       | Carbamidomethyl (C)             |
| Variable modifications:                                                                                                    | Amidated (C-term),Oxidation (M) |
| Mass values:                                                                                                               | Monoisotopic                    |
| Peptide mass tolerance:                                                                                                    | 10 ppm                          |
| Fragment mass tolerance:                                                                                                   | 0.2 Da                          |
| Max missed cleavages:                                                                                                      | 1                               |
| Instrument type:                                                                                                           | ESI-QUAD-TOF                    |
| Ions score or expect cut-off:                                                                                              | 0.005                           |
| Scoring :                                                                                                                  | MudPIT                          |
| <u>Subsamples: 2015-09-23 ETP Kirsten PRM A3.mgf, 2015-09-23 ETP Kirsten PRM B3.mgf, 2015-09-23 ETP Kirsten PRM E3.mgf</u> |                                 |
| Database:                                                                                                                  | Proteins                        |
| Fasta Version:                                                                                                             | Proteins_2015-09-22.fasta       |
| # Sequences:                                                                                                               | 267                             |
| Taxonomy:                                                                                                                  | All entries                     |
| Enzyme:                                                                                                                    | Lys-C                           |
| Fixed modifications:                                                                                                       | Carbamidomethyl (C)             |
| Variable modifications:                                                                                                    | Amidated (C-term),Oxidation (M) |
| Mass values:                                                                                                               | Monoisotopic                    |
| Peptide mass tolerance:                                                                                                    | 10 ppm                          |
| Fragment mass tolerance:                                                                                                   | 0.2 Da                          |
| Max missed cleavages:                                                                                                      | 1                               |
| Instrument type:                                                                                                           | ESI-QUAD-TOF                    |
| Ions score or expect cut-off:                                                                                              | 0.005                           |
| Scoring :                                                                                                                  | MudPIT                          |

Table S3 Coverage Overview for PRM-MS Search

| 2015-09-23 - PRM-MS analysis - search results |              |                             |          |                                      |            |               |                     |                 |               |       |     |            |                         |                   |
|-----------------------------------------------|--------------|-----------------------------|----------|--------------------------------------|------------|---------------|---------------------|-----------------|---------------|-------|-----|------------|-------------------------|-------------------|
| Sample Name                                   | Accession Nr | Protein Name                | Mass kDa | Protein Sequence                     | Coverage % | Protein Score | Significant Matches | Unique Peptides | Peptide Score | Start | End | Duplicates | Peptide Sequences       | Modifications     |
| sCT fibrils                                   | P01263_Pep   | Calcitonin-1 Peptide 83-114 | 3.547    | CSNLSTCVLGKLSQELHKLQ<br>TYPRTNTGSGTP | 75         | 1619          | 98                  | 3               | 70            | 1     | 11  | 10         | -<br>.CSNLSTCVL<br>GK.L |                   |
| Lower band                                    |              |                             |          |                                      |            |               |                     |                 | 40            | 12    | 18  | 22         | K.LSQELHK.<br>L         |                   |
| (2015-09-23 ETP Kirsten PRM A1.mgf)           |              |                             |          |                                      |            |               |                     |                 | 58            | 19    | 24  | 66         | K.LQTYPR.T              |                   |
| sCT fibrils                                   | P01263_Pep   | Calcitonin-1 Peptide 83-114 | 3.547    | CSNLSTCVLGKLSQELHKLQ<br>TYPRTNTGSGTP | 100        | 440           | 35                  | 3               | 55            | 1     | 11  | 6          | -<br>.CSNLSTCVL<br>GK.L |                   |
| Upper band                                    |              |                             |          |                                      |            |               |                     |                 | 42            | 12    | 18  | 17         | K.LSQELHK.<br>L         |                   |
| (2015-09-23 ETP Kirsten PRM A3.mgf)           |              |                             |          |                                      |            |               |                     |                 | 42            | 19    | 32  | 12         | K.LQTYPRTN<br>TGSGTP.-  | Amidated (C-term) |
| sCT fibrils added 100 weight heparin          | P01263_Pep   | Calcitonin-1 Peptide 83-114 | 3.547    | CSNLSTCVLGKLSQELHKLQ<br>TYPRTNTGSGTP | 75         | 2087          | 132                 | 3               | 74            | 1     | 11  | 10         | -<br>.CSNLSTCVL<br>GK.L |                   |
| Lower band                                    |              |                             |          |                                      |            |               |                     |                 | 41            | 12    | 18  | 27         | K.LSQELHK.<br>L         |                   |
| (2015-09-23 ETP Kirsten PRM B1.mgf)           |              |                             |          |                                      |            |               |                     |                 | 50            | 19    | 24  | 95         | K.LQTYPR.T              |                   |
| sCT fibrils added 100 weight heparin          | P01263_Pep   | Calcitonin-1 Peptide 83-114 | 3.547    | CSNLSTCVLGKLSQELHKLQ<br>TYPRTNTGSGTP | 100        | 797           | 52                  | 3               | 79            | 1     | 11  | 11         | -<br>.CSNLSTCVL<br>GK.L |                   |
| Upper band                                    |              |                             |          |                                      |            |               |                     |                 | 39            | 12    | 18  | 28         | K.LSQELHK.<br>L         |                   |
| (2015-09-23 ETP Kirsten PRM B3.mgf)           |              |                             |          |                                      |            |               |                     |                 | 29            | 19    | 32  | 13         | K.LQTYPRTN<br>TGSGTP.-  | Amidated (C-term) |
| sCTHep fibrils 100%                           | P01263_Pep   | Calcitonin-1 Peptide 83-114 | 3.547    | CSNLSTCVLGKLSQELHKLQ<br>TYPRTNTGSGTP | 75         | 2471          | 138                 | 3               | 79            | 1     | 11  | 18         | -<br>.CSNLSTCVL<br>GK.L |                   |
| Lower band                                    |              |                             |          |                                      |            |               |                     |                 | 37            | 12    | 18  | 25         | K.LSQELHK.<br>L         |                   |
| (2015-09-23 ETP Kirsten PRM E1.mgf)           |              |                             |          |                                      |            |               |                     |                 | 53            | 19    | 24  | 95         | K.LQTYPR.T              |                   |
| sCTHep fibrils 100%                           | P01263_Pep   | Calcitonin-1 Peptide 83-114 | 3.547    | CSNLSTCVLGKLSQELHKLQ<br>TYPRTNTGSGTP | 100        | 877           | 49                  | 3               | 73            | 1     | 11  | 13         | -<br>.CSNLSTCVL<br>GK.L |                   |
| Upper band                                    |              |                             |          |                                      |            |               |                     |                 | 38            | 12    | 18  | 26         | K.LSQELHK.<br>L         |                   |
| (2015-09-23 ETP Kirsten PRM E3.mgf)           |              |                             |          |                                      |            |               |                     |                 | 29            | 19    | 32  | 10         | K.LQTYPRTN<br>TGSGTP.-  | Amidated (C-term) |
